# Supplementary material for: The maternal embryonic leucine zipper kinase (MELK) is upregulated in high-grade prostate cancer
Source: Springer Nature journal article supplement (doi:10.1007/s00109-012-0949-1), 2012-09-03
Supplement: 109_2012_949_MOESM1_ESM.pdf [file 109_2012_949_MOESM1_ESM.pdf]

# **The Maternal Embryonic Leucine Zipper Kinase (MELK) is Upregulated in High-Grade Prostate Cancer**

Ruprecht Kuner, Maria Fälth, Nicole Chui Pressinotti, Jan C. Brase, Sabrina Balaguer Puig, Jennifer Metzger, Stephan Gade, Georg Schäfer, Georg Bartsch, Eberhard Steiner, Helmut Klocker, Holger Sültmann

**J Mol Med 2012**

## **Supplementary methods:**

### **Tissue specimens and clinical data**

Immediately after surgery, the prostate specimens were rapidly processed for histopathological analysis and stored in Tissue-Tek OCT (Sakura, Alphen, Netherlands), embedded cryo-blocks at -80°C or in paraffin-embedded formalin-fixed tissue blocks (FFPE) at room temperature, respectively. RNA samples were isolated from paired tumor and non-malignant (benign) tissue samples from a radical prostatectomy cohort with Gleason scores (GS) between 6 and 10 (Table 1).

All tumor and control areas were assigned by an experienced uropathologist (G.S.) who used a HE stained section for selecting appropriate tissue regions. Non-malignant, benign areas were chosen well separated from tumor areas. Several 10 µm cryo- or FFPE sections were prepared and the assigned tissue was collected by macrodissection using the HE stain as a template. Detailed clinical data are given in Supplementary Table 1.

To this day the Gleason score reflecting the histomorphological pattern and degree of dedifferentiation of prostate tumors is the gold standard of prostate cancer categorization and the best available single parameter for estimation of the risk for progression and worse prognosis [1, 2]. The Gleason system categorizes prostate tumors according to the histomorphological pattern such as loss of a differentiated glandular structure into Gleason patterns (GP) 1 (fully differentiated) to 5 (fully dedifferentiated). The Gleason Score is formed by the sum of the most (primary) and the second most (secondary) predominant Gleason patterns of a tumor and ranges from 2 to 10 [3, 4].

The criteria on PSA-density, biopsy Gleason Score and tumor extension defined by Epstein were used to assign tumor cases into clinically significant and insignificant groups [5-7]. Patients with an ERG gene rearrangement were assessed using a FISH break-apart assay [8]. Alternative approaches for tumor classification risk groups are based on genetic alterations, above all the TMPRSS2-ERG gene rearrangement that is found in about 50% of all prostate tumors [9, 10].

### **Western blotting**

The following primary antibodies were used: Anti-MELK (HPA017214, Sigma), Anti-UBE2C (ab56861, Abcam, Cambridge, UK), Anti-FOXM1 (ab55006, Abcam), Anti-CDC20 (4823, Cell Signaling, Danvers, MA, USA) Anti-AURKA (HPA002636, Sigma), Anti-AR (sc-816, Santa Cruz), Anti-pAKT (9271, Cell Signaling), Anti-Tubulin, alpha (2144, Cell Signaling, Loading control).

1. Egevad L, Granfors T, Karlberg L, Bergh A, Stattin P (2002). Prognostic value of the Gleason score in prostate cancer. *BJU Int* 89, 538-542.
2. Kambara T, Oyama T, Segawa A, Fukabori Y, Yoshida K (2009). Prognostic significance of global grading system of Gleason score in patients with prostate cancer with bone metastasis. *BJU Int* 105, 1519-1525.
3. Gleason DF and Mellinger GT (1974). Prediction of prognosis for prostatic adenocarcinoma by combined histological grading and clinical staging *J Urol* 111, 58-64.
4. Epstein JI (2010). An update of the Gleason grading system. *J Urol* 183, 433-440.
5. Epstein JI, Walsh PC, Carmichael M, Brendler CB (1994). Pathologic and clinical findings to predict tumor extent of nonpalpable (stage T1c) prostate cancer. *JAMA* 271, 368-374.
6. Epstein JI, Pizov G, Walsh PC (1993). Correlation of pathologic findings with progression following radical retropubic prostatectomy. *Cancer* 71, 3582-3593.
7. Ploussard G, Epstein JI, Montironi R, Carroll PR, Wirth M, Grimm MO, Bjartell AS, Montorsi F, Freedland SJ, Erbersdobler A, et al. (2011). The contemporary concept of significant versus insignificant prostate cancer. *Eur Urol* 60, 291-303.
8. Mosquera JM, Perner S, Demichelis F, Kim R, Hofer MD, Mertz KD, Paris PL, Simko J, Collins C, Bismar TA, et al. (2007). Morphological features of TMPRSS2-ERG gene fusion prostate cancer. *J Pathol* 212, 91-101.
9. Scheble VJ, Braun M, Beroukhir R, Mermel CH, Ruiz C, Wilbertz T, Stiedl AC, Petersen K, Reischl M, Kuefer R, Schilling D, Fend F, Kristiansen G, Meyerson M, Rubin

MA, Bubendorf L, Perner S. ERG rearrangement is specific to prostate cancer and does not occur in any other common tumor. *Modern pathology : an official journal of the United States and Canadian Academy of Pathology, Inc* 2010;23(8):1061-1067.

10. Tomlins SA, Rhodes DR, Perner S, Dhanasekaran SM, Mehra R, Sun XW, Varambally S, Cao X, Tchinda J, Kuefer R, Lee C, Montie JE, Shah RB, Pienta KJ, Rubin MA, Chinnaiyan AM. Recurrent fusion of TMPRSS2 and ETS transcription factor genes in prostate cancer. *Science* 2005;310(5748):644-648.

**Supplementary Figure 1:** Microarray analysis of Siomycin A treated LNCaP indicates specific pattern of responsive genes. Siomycin A treated cells (biological triplicates, S1-3) are compared to DMSO controls (C1-3) for two time points. Here, expression of 33 cell cycle genes coexpressed with MELK and upregulated in aggressive prostate cancer is visualized by hierarchical clustering. In LNCaP cells the majority of these genes (25 out of 33) were downregulated after 24h and 48h Siomycin A treatment.

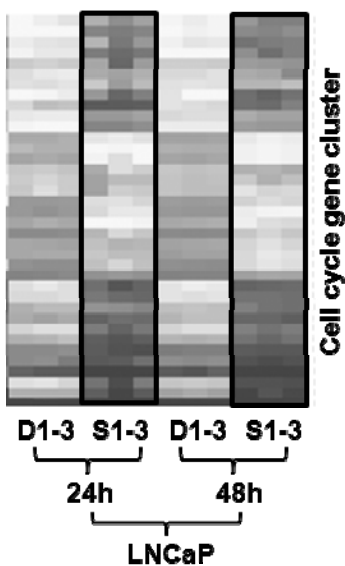

#### Supplementary Tables:

Supplementary data is given for detailed lists of differentially expressed genes, ontology statistics and assay information. For Illumina data universal probe ID (Ref ID) is given in all gene lists including statistical analysis outcome (LIMMA software, p-value, linear fold change). Gene ontology statistics was done using GOstat software for down- and upregulated genes, respectively. Results were only documented if significant biological processes were associated with these genes.





|        |                  |      |   |   |   |    |   |   |   |     |     |    |       |    |    |   |   |   |    |             |            |     |     |     |
|--------|------------------|------|---|---|---|----|---|---|---|-----|-----|----|-------|----|----|---|---|---|----|-------------|------------|-----|-----|-----|
| Val_32 | tumor and benign | low  | 7 | 3 | 4 | 2c | x | x | 0 | N/A | N/A | 50 | 9.9   | 10 | 36 | 7 | 3 | 4 | 18 | 60          | 0.55       | N/A | N/A | N/A |
| Val_33 | tumor and benign | low  | 5 | 3 | 2 | 2c | x | x | 0 | N/A | N/A | 60 | 3.9   | 16 | 25 | 6 | 3 | 3 | 29 | 20          | 0.13448276 | N/A | N/A | N/A |
| Val_34 | tumor and benign | low  | 5 | 3 | 2 | 2c | x | x | 0 | N/A | N/A | 67 | 9.03  | 15 | 38 | 6 | 3 | 3 | 40 | 26.6666667  | 0.22575    | N/A | N/A | N/A |
| Val_35 | tumor and benign | low  | 5 | 3 | 2 | 2c | x | x | 0 | N/A | N/A | 55 | 4     | 10 | 45 | 6 | 3 | 3 | 46 | 6.6666667   | 0.08695652 | N/A | N/A | N/A |
| Val_36 | tumor and benign | low  | 6 | 3 | 3 | 2c | x | x | 0 | N/A | N/A | 61 | 3.5   | 15 | 30 | 6 | 3 | 3 | 30 | 40          | 0.11666667 | N/A | N/A | N/A |
| Val_37 | tumor and benign | low  | 6 | 3 | 3 | 2a | x | x | 0 | N/A | N/A | 56 | 2.8   | 15 | 34 | 6 | 3 | 3 | 28 | 6.6666667   | 0.1        | N/A | N/A | N/A |
| Val_38 | tumor and benign | low  | 6 | 3 | 3 | 2c | x | x | 1 | N/A | N/A | 61 | 10.78 | 7  | 45 | 6 | 3 | 3 | 50 | 6.6666667   | 0.2156     | N/A | N/A | N/A |
| Val_39 | tumor and benign | low  | 7 | 3 | 4 | 2c | 0 | x | x | N/A | N/A | 59 | 9     | 10 | 42 | 6 | 3 | 3 | 27 | 20          | 0.33333333 | N/A | N/A | N/A |
| Val_40 | tumor and benign | low  | 6 | 3 | 3 | 2c | 0 | x | 0 | N/A | N/A | 54 | 7.8   | 10 | 32 | 6 | 3 | 3 | 17 | 50          | 0.45882353 | N/A | N/A | N/A |
| Val_41 | tumor and benign | low  | 5 | 3 | 2 | 2c | 0 | x | 0 | N/A | N/A | 58 | 7.9   | 9  | 40 | 5 | 2 | 3 | 25 | 10          | 0.316      | N/A | N/A | N/A |
| Val_42 | tumor and benign | low  | 6 | 3 | 3 | 2a | 0 | x | 0 | N/A | N/A | 65 | 2.1   | 18 | 55 | 6 | 3 | 3 | 42 | 20          | 0.05       | N/A | N/A | N/A |
| Val_43 | tumor and benign | low  | 5 | 2 | 3 | 2c | 0 | x | 0 | N/A | N/A | 57 | 2.6   | 12 |    | 7 | 3 | 4 | 20 | 20          | 0.13       | N/A | N/A | N/A |
| Val_44 | tumor and benign | low  | 7 | 3 | 4 | 2c | x | x | 1 | N/A | N/A | 63 | 3.77  | 17 | 30 | 7 | 3 | 4 | 42 | 26.6666667  | 0.0897619  | N/A | N/A | N/A |
| Val_45 | tumor and benign | low  | 6 | 3 | 3 | 2c | x | x | 0 | N/A | N/A | 64 | 3.64  | 14 | 48 | 6 | 3 | 3 | 50 | 6.6666667   | 0.0728     | N/A | N/A | N/A |
| Val_46 | tumor and benign | low  | 6 | 3 | 3 | 2c | x | x | 0 | N/A | N/A | 64 | 4.27  | 15 | 30 | 6 | 3 | 3 | 35 | 6.6666667   | 0.122      | N/A | N/A | N/A |
| Val_47 | tumor and benign | low  | 6 | 3 | 3 | 2c | 0 | x | 0 | N/A | N/A | 49 | 5.3   | 6  | 20 | 5 | 2 | 3 | 17 | 30          | 0.31176471 | N/A | N/A | N/A |
| Val_48 | tumor and benign | low  | 5 | 2 | 3 | 2c | 0 | x | 0 | N/A | N/A | 62 | 5.4   | 12 | 47 | 5 | 2 | 3 | 39 | 2.85714286  | 0.13846154 | N/A | N/A | N/A |
| Val_49 | tumor and benign | low  | 6 | 3 | 3 | 2c | 0 | x | 0 | N/A | N/A | 52 | 3.6   | 14 | 44 | 6 | 3 | 3 | 28 | 50          | 0.12857143 | N/A | N/A | N/A |
| Val_50 | tumor and benign | low  | 5 | 3 | 2 | 2c | x | x | 0 | N/A | N/A | 57 | 4.88  | 12 | 30 | 6 | 3 | 3 | 40 | 6.6666667   | 0.122      | N/A | N/A | N/A |
| Val_51 | tumor and benign | low  | 5 | 3 | 2 | 2c | 0 | x | 0 | N/A | N/A | 54 | 4.2   | 22 | 37 | 6 | 3 | 3 | 30 | 10          | 0.14       | N/A | N/A | N/A |
| Val_52 | tumor and benign | high | 9 | 4 | 5 | 3a | 0 | x | 0 | N/A | N/A | 67 | 6.91  | 6  | 27 | 7 | 3 | 4 | 20 | 46.6666667  | 0.3455     | N/A | N/A | N/A |
| Val_53 | tumor and benign | low  | 6 | 3 | 3 | 2a | 0 | x | 0 | N/A | N/A | 48 | 2     | 10 |    | 6 | 3 | 3 | 22 | 20          | 0.09090909 | N/A | N/A | N/A |
| Val_54 | tumor and benign | low  | 7 | 3 | 4 | 3a | 0 | x | 0 | N/A | N/A | 59 | 2.1   | 16 | 20 | 6 | 3 | 3 | 20 | 18.1818182  | 0.105      | N/A | N/A | N/A |
| Val_55 | tumor and benign | low  | 6 | 3 | 3 | 3a | 0 | x | 0 | N/A | N/A | 56 | 3.1   | 5  | 32 | 6 | 3 | 3 | 17 | 30          | 0.18235294 | N/A | N/A | N/A |
| Val_56 | tumor and benign | low  | 6 | 3 | 3 | 2c | 0 | x | 1 | N/A | N/A | 55 | 8.3   | 6  |    | 4 | 2 | 2 | 29 | 10          | 0.2862069  | N/A | N/A | N/A |
| Val_57 | tumor and benign | high | 9 | 4 | 5 | 3a | x | x | 0 | N/A | N/A | 65 | 2.65  | 17 | 30 | 6 | 3 | 3 | 39 | 6.6666667   | 0.06794872 | N/A | N/A | N/A |
| Val_58 | tumor and benign | low  | 5 | 2 | 3 | 2b | 0 | x | 0 | N/A | N/A | 57 | 8.2   | 11 |    | 6 | 3 | 3 | 31 | 30          | 0.26451613 | N/A | N/A | N/A |
| Val_59 | tumor and benign | low  | 5 | 2 | 3 | 2b | 0 | x | 0 | N/A | N/A | 50 | 4.5   | 13 | 48 | 6 | 3 | 3 | 24 | 33.3333333  | 0.1875     | N/A | N/A | N/A |
| Val_60 | tumor and benign | low  | 6 | 3 | 3 | 2b | x | x | 0 | N/A | N/A | 63 | 6.28  | 6  | 32 | 6 | 3 | 3 | 28 | 6.6666667   | 0.22428571 | N/A | N/A | N/A |
| Val_61 | tumor and benign | low  | 5 | 3 | 2 | 2c | x | x | 0 | N/A | N/A | 68 | 7.27  | 40 | 70 | 6 | 3 | 3 | 53 | 26.6666667  | 0.13716981 | N/A | N/A | N/A |
| Val_62 | tumor and benign | high | 7 | 4 | 3 | 3a | 0 | x | 0 | N/A | N/A | 67 | 6.1   | 20 | 30 | 7 | 3 | 4 | 25 | 46.6666667  | 0.244      | N/A | N/A | N/A |
| Val_63 | tumor and benign | low  | 7 | 3 | 4 | 2c | x | x | 0 | N/A | N/A | 60 | 2.2   | 10 | 30 | 6 | 3 | 3 | 28 | 6.6666667   | 0.07857143 | N/A | N/A | N/A |
| Val_64 | tumor and benign | low  | 7 | 3 | 4 | 3a | 0 | x | 1 | N/A | N/A | 60 | 6.45  | 10 | 31 | 6 | 3 | 3 | 25 | 66.6666667  | 0.258      | N/A | N/A | N/A |
| Val_65 | tumor and benign | high | 8 | 4 | 4 | 3b | x | x | 1 | N/A | N/A | 68 | 20.75 | 10 | 60 | 6 | 3 | 3 | 50 | 13.3333333  | 0.415      | N/A | N/A | N/A |
| Val_66 | tumor and benign | high | 9 | 5 | 4 | 3b | 0 | x | 0 | N/A | N/A | 67 | 5.9   | 15 | 61 | 7 | 4 | 3 | 28 | 40          | 0.21071429 | N/A | N/A | N/A |
| Val_67 | tumor and benign | low  | 5 | 2 | 3 | 2b | 0 | x | 0 | N/A | N/A | 67 | 8.5   | 15 | 62 | 4 | 2 | 2 | 47 | 14.2857143  | 0.18085106 | N/A | N/A | N/A |
| Val_68 | tumor and benign | low  | 6 | 3 | 3 | 2b | x | x | 0 | N/A | N/A | 69 | 7.3   | 13 |    | 6 | 3 | 3 | 26 | 11.11111111 | 0.28076923 | N/A | N/A | N/A |
| Val_69 | tumor and benign | low  | 7 | 3 | 4 | 2a | 0 | x | 0 | N/A | N/A | 53 | 2.2   | 11 | 40 | 6 | 3 | 3 | 25 | 10          | 0.088      | N/A | N/A | N/A |
| Val_70 | tumor and benign | low  | 5 | 2 | 3 | 2b | 0 | x | 0 | N/A | N/A | 57 | 6.2   | 13 |    | 7 | 3 | 4 | 40 | 30          | 0.155      | N/A | N/A | N/A |
| Val_71 | tumor and benign | high | 9 | 4 | 5 | 3b | x | x | 1 | N/A | N/A | 72 | 18.09 | 9  | 53 | 8 | 3 | 5 | 40 | 26.6666667  | 0.45225    | N/A | N/A | N/A |
| Val_72 | tumor and benign | high | 8 | 3 | 5 | 2b | 0 | x | 0 | N/A | N/A | 68 | 44    | 0  | 36 | 8 | 3 | 5 | 20 | 33.3333333  | 2.2        | N/A | N/A | N/A |
| Val_73 | tumor and benign | low  | 6 | 3 | 3 | 2b | 0 | x | 0 | N/A | N/A | 65 | 5.5   | 24 | 60 | 4 | 2 | 2 | 37 | 6.6666667   | 0.14864865 | N/A | N/A | N/A |
| Val_74 | tumor and benign | low  | 7 | 3 | 4 | 2b | 0 | x | 1 | N/A | N/A | 61 | 4.7   | 9  | 30 | 7 | 3 | 4 | 26 | 40          | 0.18076923 | N/A | N/A | N/A |
| Val_75 | tumor and benign | low  | 7 | 3 | 4 | 2c | x | x | 0 | N/A | N/A | 55 | 3.15  | 12 |    | 6 | 3 | 3 | 35 | 20          | 0.09       | N/A | N/A | N/A |
| Val_76 | tumor and benign | low  | 6 | 3 | 3 | 3a | 0 | x | 0 | N/A | N/A | 69 | 6.8   | 16 |    | 7 | 3 | 4 | 26 | 20          | 0.26153846 | N/A | N/A | N/A |
| Val_77 | tumor and benign | high | 8 | 4 | 4 | 2b | 0 | x | 0 | N/A | N/A | 55 | 7.4   | 8  |    | 7 | 3 | 4 | 25 | 36.3636364  | 0.296      | N/A | N/A | N/A |
| Val_78 | tumor and benign | high | 9 | 5 | 4 | 2c | x | x | 0 | N/A | N/A | 51 | 6.9   | 5  | 37 | 7 | 3 | 4 | 25 | 13.3333333  | 0.276      | N/A | N/A | N/A |
| Val_79 | tumor and benign | high | 8 | 3 | 5 | 2c | x | x | 0 | N/A | N/A | 59 | 4.4   | 10 | 50 | 6 | 3 | 3 | 50 | 10          | 0.088      | N/A | N/A | N/A |

**Supplementary Table 2:** Detailed information for gene specific Taqman and siRNA assays.

| Gene Symbol | Taqman Assay ID | RefSeq         | Exon Boundary | Median Cp Tissues<br>Tumor / Benign | Median Cp Cell<br>line PC3 /LNCaP | Dharmacon ON-<br>TARGETplus SMARTpool |
|-------------|-----------------|----------------|---------------|-------------------------------------|-----------------------------------|---------------------------------------|
| MELK        | Hs00207681_m1   | NM_014791      | 5-6           | 38.12 / 40.00                       | 30.70 / 30.54                     | L-004029-00                           |
| UBE2C       | Hs00964100_g1   | NM_181799.1    | 5-6           | 34.01 / 34.58                       | 24.70 / 26.36                     | L-004693-00                           |
| CDC20       | Hs00415851_g1   | NM_001255.2    | 1-2           | 36.26 / 36.71                       | 29.75 / 29.75                     | N/A                                   |
| CDCA8       | Hs00983655_m1   | NM_018101.2    | 3-4           | 35.05 / 35.65                       | 28.99 / 28.71                     | N/A                                   |
| PRC1        | Hs00187740_m1   | NM_199413.1    | 1-2           | 34.81 / 35.12                       | N/A                               | N/A                                   |
| CCNB2       | Hs00270424_m1   | NM_004701.2    | 1-2           | 32.93 / 33.14                       | N/A                               | N/A                                   |
| POLR2A      | Hs00172187_m1   | NM_000937.4    | 1-2           | 34.68 / 34.60                       | N/A                               | N/A                                   |
| FOXM1       | Hs01073586_m1   | NM_001243088.1 | 4-5           | N/A                                 | 27.51 / 28.01                     | N/A                                   |
| B2M         | Hs99999907_m1   | NM_004048.2    | 2-3           | 23.74 / 23.84                       | 23.04 / 24.89                     | N/A                                   |













|     |              |         |         |        |         |        |              |           |     |              |         |         |        |         |        |              |           |
|-----|--------------|---------|---------|--------|---------|--------|--------------|-----------|-----|--------------|---------|---------|--------|---------|--------|--------------|-----------|
| 331 | ILMN_1708414 | 9.2504  | 0.04676 | 0.7309 | -4.6555 | 0.4581 | GNL3L        | 54552     | 331 | ILMN_1691143 | 7.2665  | 0.04569 | 1.3376 | 4.6135  | 0.4699 | RAB18        | 22931     |
| 332 | ILMN_3289262 | 9.2384  | 0.04676 | 1.3295 | 4.6581  | 0.4628 | LOC100131261 | 100131261 | 332 | ILMN_3289730 | 9.0697  | 0.04569 | 1.4096 | 4.6106  | 0.4646 | LOC100132199 | 100132199 |
| 333 | ILMN_1702447 | 11.0031 | 0.04692 | 0.7329 | -4.6520 | 0.4519 | IGF2BP2      | 10644     | 333 | ILMN_1660858 | 8.4163  | 0.04592 | 0.7460 | -4.6057 | 0.4555 | RIN1         | 9610      |
| 334 | ILMN_2075927 | 8.9237  | 0.04751 | 0.7719 | -4.6441 | 0.4375 | STK40        | 83931     | 334 | ILMN_1726516 | 10.3963 | 0.04592 | 0.7486 | -4.6051 | 0.4543 | SCRIB        | 23513     |
| 335 | ILMN_2157277 | 12.1528 | 0.04768 | 0.7698 | -4.6397 | 0.4297 | AKR1D1       | 6718      | 335 | ILMN_1859946 | 11.8941 | 0.04611 | 1.3573 | 4.6015  | 0.4478 | NA           | NA        |
| 336 | ILMN_1699503 | 9.2364  | 0.04768 | 1.2967 | 4.6392  | 0.4287 | UBE2D2       | 7322      | 336 | ILMN_1671911 | 10.2370 | 0.04617 | 0.7040 | -4.5994 | 0.4438 | MTA1         | 9112      |
| 337 | ILMN_3279414 | 9.4371  | 0.04791 | 1.4390 | 4.6352  | 0.4215 | LOC440595    | 440595    | 337 | ILMN_1857017 | 9.0698  | 0.04637 | 0.6896 | -4.5955 | 0.4366 | NA           | NA        |
| 338 | ILMN_1669268 | 8.3261  | 0.04802 | 0.7260 | -4.6298 | 0.4118 | MEK3D        | 399664    | 338 | ILMN_3238137 | 8.0105  | 0.04637 | 1.3578 | 4.5944  | 0.4345 | LOC100133008 | 100133008 |
| 339 | ILMN_2044832 | 10.0503 | 0.04802 | 0.7632 | -4.6322 | 0.4162 | NOP56        | 10528     | 339 | ILMN_2371169 | 11.5712 | 0.04660 | 0.6754 | -4.5745 | 0.3979 | ZYX          | 7791      |
| 340 | ILMN_1732688 | 9.9642  | 0.04802 | 1.3122 | 4.6295  | 0.4113 | DUT          | 1854      | 340 | ILMN_1698419 | 11.0778 | 0.04660 | 0.6766 | -4.5811 | 0.4100 | NCOR2        | 9612      |
| 341 | ILMN_1694100 | 7.3032  | 0.04843 | 1.3229 | 4.6228  | 0.3990 | PRIM2        | 5558      | 341 | ILMN_1810055 | 9.2484  | 0.04660 | 0.6787 | -4.5787 | 0.4056 | ITFG3        | 83986     |
| 342 | ILMN_2151441 | 8.7502  | 0.04843 | 1.3309 | 4.6222  | 0.3980 | FAM103A1     | 83640     | 342 | ILMN_1718610 | 9.1804  | 0.04660 | 0.7316 | -4.5824 | 0.4125 | ARHGAP17     | 55114     |
| 343 | ILMN_2100458 | 8.3742  | 0.04847 | 1.2987 | 4.6203  | 0.3945 | RFESD        | 317671    | 343 | ILMN_1663090 | 7.9010  | 0.04660 | 0.7478 | -4.5827 | 0.4131 | SON          | 6651      |
| 344 | ILMN_2363658 | 10.0153 | 0.04851 | 0.6576 | -4.6168 | 0.3883 | PXDN         | 7837      | 344 | ILMN_1786396 | 7.7886  | 0.04660 | 0.7480 | -4.5777 | 0.4037 | ZZEF1        | 23140     |
| 345 | ILMN_1764158 | 7.8799  | 0.04851 | 0.7603 | -4.6174 | 0.3893 | NLGN2        | 57555     | 345 | ILMN_1672504 | 10.6517 | 0.04660 | 0.7527 | -4.5896 | 0.4257 | PDXK         | 8566      |
| 346 | ILMN_3245869 | 10.9726 | 0.04851 | 1.2970 | 4.6154  | 0.3857 | LOC440957    | 440957    | 346 | ILMN_1766657 | 8.1794  | 0.04660 | 1.3302 | 4.5826  | 0.4128 | STOM         | 2040      |
| 347 | ILMN_1770892 | 11.3095 | 0.04852 | 0.6998 | -4.6120 | 0.3796 | YY1          | 7528      | 347 | ILMN_3227604 | 7.6462  | 0.04660 | 1.3348 | 4.5751  | 0.3990 | LOC729342    | 729342    |
| 348 | ILMN_1764861 | 10.1593 | 0.04852 | 1.3348 | 4.6112  | 0.3781 | ISOC1        | 51015     | 348 | ILMN_1790973 | 9.1750  | 0.04660 | 1.3358 | 4.5830  | 0.4135 | CDS2         | 8760      |
| 349 | ILMN_2246083 | 7.6871  | 0.04852 | 1.4306 | 4.6108  | 0.3774 | C7orf28B     | 221960    | 349 | ILMN_3280496 | 8.1770  | 0.04660 | 1.3507 | 4.5857  | 0.4186 | LOC100131526 | 100131526 |
| 350 | ILMN_2049021 | 12.0396 | 0.04886 | 1.3028 | 4.6058  | 0.3683 | PTTG3P       | 26255     | 350 | ILMN_3245517 | 11.0125 | 0.04660 | 1.4015 | 4.5759  | 0.4004 | LOC100134273 | 100134273 |
| 351 | ILMN_2169839 | 10.9808 | 0.04922 | 1.3018 | 4.6006  | 0.3589 | CNPB         | 7555      | 351 | ILMN_1706521 | 11.1663 | 0.04689 | 0.7406 | -4.5700 | 0.3895 | CSNK1G2      | 1455      |
| 352 | ILMN_1745034 | 8.9963  | 0.04925 | 1.2765 | 4.5988  | 0.3556 | SLC11A2      | 4891      | 352 | ILMN_1667893 | 10.9722 | 0.04756 | 0.7495 | -4.5615 | 0.3738 | TNS3         | 64759     |
| 353 | ILMN_1806486 | 8.9830  | 0.04927 | 1.2998 | 4.5972  | 0.3527 | LOC389137    | 389137    | 353 | ILMN_1743275 | 8.2612  | 0.04759 | 0.7089 | -4.5528 | 0.3577 | SH3RF3       | 344558    |
| 354 | ILMN_2329735 | 7.4059  | 0.04953 | 0.7689 | -4.5930 | 0.3451 | ECM1         | 1893      | 354 | ILMN_1771987 | 10.4964 | 0.04759 | 0.7417 | -4.5557 | 0.3630 | SLC44A2      | 57153     |
| 355 | ILMN_1668052 | 12.3307 | 0.04969 | 0.7764 | -4.5900 | 0.3397 | FOXA2        | 3170      | 355 | ILMN_1732151 | 11.4275 | 0.04759 | 0.7528 | -4.5545 | 0.3609 | COL6A1       | 1291      |
| 356 | ILMN_1652215 | 9.3913  | 0.04995 | 1.4202 | 4.5858  | 0.3321 | LOC644310    | 644310    | 356 | ILMN_2252136 | 10.4406 | 0.04759 | 1.3415 | 4.5533  | 0.3566 | YWHAE        | 7531      |
|     |              |         |         |        |         |        |              |           | 357 | ILMN_1751760 | 7.4410  | 0.04759 | 1.3751 | 4.5555  | 0.3627 | BCAS2        | 10286     |
|     |              |         |         |        |         |        |              |           | 358 | ILMN_3239574 | 8.4694  | 0.04759 | 1.4702 | 4.5585  | 0.3682 | SNORD3A      | 780851    |
|     |              |         |         |        |         |        |              |           | 359 | ILMN_2128293 | 9.1586  | 0.04790 | 1.4150 | 4.5482  | 0.3491 | APIP         | 51074     |
|     |              |         |         |        |         |        |              |           | 360 | ILMN_1706583 | 9.6275  | 0.04810 | 1.3655 | 4.5439  | 0.3411 | DLAT         | 1737      |
|     |              |         |         |        |         |        |              |           | 361 | ILMN_1701854 | 9.8411  | 0.04810 | 1.3681 | 4.5434  | 0.3402 | NGF5         | 2787      |
|     |              |         |         |        |         |        |              |           | 362 | ILMN_1766981 | 10.4598 | 0.04812 | 1.3221 | 4.5419  | 0.3374 | UNC50        | 25972     |
|     |              |         |         |        |         |        |              |           | 363 | ILMN_1810289 | 11.3773 | 0.04875 | 0.7366 | -4.5329 | 0.3208 | FER1L3       | 26509     |
|     |              |         |         |        |         |        |              |           | 364 | ILMN_3284177 | 8.4639  | 0.04875 | 1.4501 | 4.5327  | 0.3203 | LOC100132425 | 100132425 |
|     |              |         |         |        |         |        |              |           | 365 | ILMN_1719985 | 10.5579 | 0.04880 | 0.7294 | -4.5307 | 0.3167 | FEM1A        | 55527     |
|     |              |         |         |        |         |        |              |           | 366 | ILMN_1683313 | 11.1708 | 0.04904 | 0.7015 | -4.5243 | 0.3048 | ST3GAL1      | 6482      |
|     |              |         |         |        |         |        |              |           | 367 | ILMN_2412380 | 8.4736  | 0.04904 | 1.3691 | 4.5254  | 0.3069 | TSC22D1      | 8848      |
|     |              |         |         |        |         |        |              |           | 368 | ILMN_3188076 | 11.6037 | 0.04904 | 1.6150 | 4.5243  | 0.3047 | LOC100128060 | 100128060 |
|     |              |         |         |        |         |        |              |           | 369 | ILMN_1667034 | 10.2074 | 0.04923 | 0.7412 | -4.5210 | 0.2987 | PDPR         | 55066     |
|     |              |         |         |        |         |        |              |           | 370 | ILMN_1738093 | 9.2028  | 0.04929 | 0.7566 | -4.5191 | 0.2952 | TMEM118      | 84900     |
|     |              |         |         |        |         |        |              |           | 371 | ILMN_1703246 | 8.6245  | 0.04947 | 0.7162 | -4.5120 | 0.2819 | SBF1         | 6305      |
|     |              |         |         |        |         |        |              |           | 372 | ILMN_1698225 | 7.8815  | 0.04947 | 0.7350 | -4.5141 | 0.2858 | MYO5A        | 4644      |
|     |              |         |         |        |         |        |              |           | 373 | ILMN_2349393 | 11.5172 | 0.04947 | 0.7455 | -4.5121 | 0.2822 | MDK          | 4192      |
|     |              |         |         |        |         |        |              |           | 374 | ILMN_2347044 | 7.9814  | 0.04947 | 1.3192 | 4.5133  | 0.2844 | SLC25A14     | 9016      |
|     |              |         |         |        |         |        |              |           | 375 | ILMN_2410924 | 8.5868  | 0.04953 | 1.4511 | 4.5100  | 0.2783 | PLOD2        | 5352      |
|     |              |         |         |        |         |        |              |           | 376 | ILMN_3216794 | 7.5503  | 0.04955 | 1.3478 | 4.5080  | 0.2745 | LOC644860    | 644860    |
|     |              |         |         |        |         |        |              |           | 377 | ILMN_2149400 | 7.7792  | 0.04955 | 1.3741 | 4.5072  | 0.2731 | SPC25        | 57405     |
|     |              |         |         |        |         |        |              |           | 378 | ILMN_1660793 | 9.1601  | 0.04975 | 0.7434 | -4.5026 | 0.2645 | PAQR4        | 124222    |
|     |              |         |         |        |         |        |              |           | 379 | ILMN_1692790 | 8.6737  | 0.04975 | 1.3378 | 4.5027  | 0.2648 | ITGB3BP      | 23421     |

**Supplementary Table 5:** Downstream processes assessed to the downregulated genes upon MELK and UBE2C RNAi-based knockdown in PC3 or overlapping genes between both experiments.

**MELK knockdown deregulated genes**

| Gene regulation | GO ID      | GO Name                | Genes                                                              | Group count | Total count | p-value  |
|-----------------|------------|------------------------|--------------------------------------------------------------------|-------------|-------------|----------|
| Down            | GO:0016568 | chromatin modification | carm1; crebbp; setd2; trrap; myst4; arid1a; chd8; smarcc2; smarca4 | 9           | 219         | 2.10E-05 |
| Down            | GO:0009790 | embryonic development  | lama5; slit2; foxc1; fbn2; vegfc; lrp5; lama3; chd8; smarca4       | 9           | 235         | 3.42E-05 |
| Down            | GO:0016573 | histone acetylation;   | myst4; trrap; crebbp                                               | 3           | 13          | 0.000454 |
| Down            | GO:0016477 | cell migration         | lama5; lrp5; vegfc; lama3; nr2f1; slit2; foxc1                     | 7           | 233         | 0.00104  |

**UBE2C knockdown deregulated genes**

| Gene regulation | GO ID      | GO Name                      | Genes                                                                                        | Group count | Total count | p-value  |
|-----------------|------------|------------------------------|----------------------------------------------------------------------------------------------|-------------|-------------|----------|
| Down            | GO:0016568 | chromatin modification       | carm1; trrap; ep400; smarcc2; fbxl11; smarca4; setd2; setd1a                                 | 8           | 219         | 0.000969 |
| Down            | GO:0030029 | actin filament-based process | abl1; myo5a; c14orf173; cdc42bbp; actn4; myo9b; cdc42bpa; myh9; sptan1                       | 9           | 260         | 0.000583 |
| Down            | GO:0007067 | mitosis                      | aspm; clip1; shc1; cdc2l1; cenpe; numa1; ube2c; zzef1                                        | 8           | 239         | 0.00149  |
| Down            | GO:0007155 | cell adhesion                | clstn1; itga3; lama5; abl1; col6a2; inpp1; zyx; itgb4; ptpm; sirpa; lpp; ptpfr; col6a1; cd99 | 14          | 960         | 0.00317  |
| Down            | GO:0022403 | cell cycle phase             | aspm; abl1; clip1; shc1; cdc2l1; cenpe; numa1; ube2c; zzef1                                  | 9           | 369         | 0.00317  |

**Overlapping genes upon MELK or UBE2C knockdown**

| Gene regulation | GO ID      | GO Name                | Genes                                 | Group count | Total count | p-value |
|-----------------|------------|------------------------|---------------------------------------|-------------|-------------|---------|
| Down            | GO:0016568 | chromatin modification | carm1; trrap; smarcc2; setd2; smarca4 | 5           | 219         | 0.00788 |
| Down            | GO:0009790 | embryonic development  | lrp5; lama5; slit2; smarca4; fbn2     | 5           | 235         | 0.00837 |







|              |         |             |        |         |         |           |        |
|--------------|---------|-------------|--------|---------|---------|-----------|--------|
| ILMN_1698404 | 8.8581  | 7.80E-008   | 2.3274 | 10.0461 | 12.3801 | ERN1      | 2081   |
| ILMN_1679041 | 7.9585  | 8.97E-008   | 2.4060 | 9.9601  | 12.2196 | SLC3A2    | 6520   |
| ILMN_1813100 | 9.6560  | 1.24E-007   | 2.0469 | 9.7525  | 11.8285 | KIAA1244  | 57221  |
| ILMN_3274596 | 10.1242 | 1.47E-007   | 2.4753 | 9.6482  | 11.6299 | LOC286512 | 286512 |
| ILMN_1753342 | 12.1394 | 1.64E-007   | 2.1750 | 9.5790  | 11.4973 | 11/01/11  | 6303   |
| ILMN_1796069 | 9.0496  | 1.72E-007   | 0.4092 | -9.5510 | 11.4434 | CBLN2     | 147381 |
| ILMN_1673769 | 8.2937  | 2.20E-007   | 2.0272 | 9.3975  | 11.1468 | KCNG1     | 3755   |
| ILMN_2052208 | 8.8649  | 2.43E-007   | 2.0672 | 9.3349  | 11.0250 | GADD45A   | 1647   |
| ILMN_1696407 | 11.6204 | 4.46E-007   | 0.4506 | -8.9675 | 10.2991 | SFRS2     | 6427   |
| ILMN_1740426 | 8.3846  | 4.49E-006   | 2.3401 | 7.6320  | 7.5094  | RASD1     | 51655  |
| ILMN_1881909 | 12.5125 | 1.52E-005   | 0.3338 | -6.9841 | 6.0703  |           | NA     |
| ILMN_1791123 | 11.3612 | 0.000137722 | 2.1707 | 5.8616  | 3.4558  | TMPRSS2   | 7113   |
| ILMN_2412336 | 7.6927  | 0.000141601 | 2.0704 | 5.8475  | 3.4223  | AKR1C2    | 1646   |

**Supplementary Table 7:** Downstream processes assessed to the up- and downregulated genes upon siomycin A treatment.

**Siomycin A deregulated genes in LNCaP**

| Gene regulation | GO ID      | GO Name                                                 | Genes                                                                                                                                                                                                                                                                                                                                                                                                                                                                                                                    | Group count | Total count | p-value  |
|-----------------|------------|---------------------------------------------------------|--------------------------------------------------------------------------------------------------------------------------------------------------------------------------------------------------------------------------------------------------------------------------------------------------------------------------------------------------------------------------------------------------------------------------------------------------------------------------------------------------------------------------|-------------|-------------|----------|
| Down            | GO:0007049 | cell cycle                                              | ccnf; mcm6; <b>prc1</b> ; kpna2; tpx2; kif11; <b>aurka</b> ; c11orf82; h2afx; chek1; kifc1; <b>e2f2</b> ; mcm3; cdkn3; cdca3; fanci; suv39h1; <b>cdc20</b> ; ndc80; cdca2; racgap1; cdc25a; cks2; <b>cdc45l</b> ; cdk2; anln; birc5; cdca5; gmnn; spc24; zwint; cdc2; <b>nusap1</b> ; <b>uhrf1</b> ; cep55; <b>kntc1</b> ; exo1; cdc7; bub1; smc4; <b>stmn1</b> ; ccna2; mns1; <b>cdca8</b> ; mcm2; pbk; ttk; tubg1; <b>ccnb2</b> ; <b>cdt1</b> ; <b>aurkb</b> ; <b>ube2c</b> ; fbxo5; mad2l1; cks1b; ncapg; ccne2; mcm7 | 58          | 839         | 1.45E-57 |
| Down            | GO:0006260 | DNA replication                                         | orc6l; mcm6; pole3; rfc4; <b>tk1</b> ; tyms; exo1; mcm3; gins2; <b>mcm4</b> ; pole2; rfc5; pcna; mcm2; mcm5; maseh2a; cdc45l; cdt1; cdk2; rrm2; <b>top2a</b> ; mcm10; fen1; gmnn; pola2; polq; mcm7; ccne2                                                                                                                                                                                                                                                                                                               | 28          | 355         | 5.30E-28 |
| Down            | GO:0007051 | spindle organization and biogenesis                     | prc1; kif11; ndc80; aurka; ttk; tubg1; cks2; stmn1; ube2c; zwint                                                                                                                                                                                                                                                                                                                                                                                                                                                         | 10          | 19          | 6.63E-19 |
| Down            | GO:0006281 | DNA repair                                              | pcna; fanci; rfc4; tyms; h2afx; chek1; exo1; nudt1; top2a; fen1; polq; pole2; rad51ap1; rfc5; uhrf1                                                                                                                                                                                                                                                                                                                                                                                                                      | 15          | 392         | 1.85E-10 |
| Down            | GO:0000079 | regulation of cyclin-dependent protein kinase activity; | cdkn3; ccna2; cks1b; cdc25a; chek1; ccne2; cks2                                                                                                                                                                                                                                                                                                                                                                                                                                                                          | 7           | 49          | 6.18E-09 |
| Down            | GO:0008283 | cell proliferation                                      | pcna; tpx2; racgap1; ttk; cdc25a; chek1; bub1; cdc7; cks2; cdk2; cdkn3; cks1b; cdca7; uhrf1                                                                                                                                                                                                                                                                                                                                                                                                                              | 14          | 745         | 3.77E-06 |
| Up              | GO:0006915 | apoptosis                                               | trib3; nupr1; cbx4; ern1; ddit3; dnase2; gadd45a; ddit4; cebpg; cebpb                                                                                                                                                                                                                                                                                                                                                                                                                                                    | 10          | 855         | 0.000327 |

**Siomycin A deregulated genes in PC3**

| Gene regulation | GO ID      | GO Name                               | Genes                                                                              | Group count | Total count | p-value  |
|-----------------|------------|---------------------------------------|------------------------------------------------------------------------------------|-------------|-------------|----------|
| Down            | GO:0045859 | regulation of protein kinase activity | spred1; c5; fabp4; spry1; cdkn2b                                                   | 5           | 237         | 0.00323  |
| Down            | GO:0009611 | response to wounding                  | il1b; c5; fabp4; hoxb13; f2rl1; thbs1                                              | 6           | 423         | 0.00323  |
| Up              | GO:0006915 | apoptosis                             | il12a; angptl4; rhob; ddit3; ern1; sqstm1; tgm2; gadd45a; ddit4; blid; pim1; hmox1 | 12          | 855         | 3.18E-05 |
| Up              | GO:0008283 | cell proliferation                    | il12a; myc; insig1; adm; fth1; adamts1; tgm2; pim1; cyr61; hmox1                   | 10          | 745         | 0.000217 |
| Up              | GO:0007050 | cell cycle arrest                     | ddit3; ern1; myc; gadd45a                                                          | 4           | 101         | 0.00202  |
| Up              | GO:0008202 | steroid metabolic process             | akr1c4; hmgs1; insig1; npc1; adm                                                   | 5           | 223         | 0.00289  |
| Up              | GO:0048514 | blood vessel morphogenesis            | angptl4; tgm2; rhob; hmox1                                                         | 4           | 147         | 0.00492  |
